# Supplementary material
Source: ML conference proceedings conference paper supplement (https://openreview.net/forum?id=iVZhbLNQTU)
Supplement: supplementary_material [file attachment]

486

## 7. Appendix

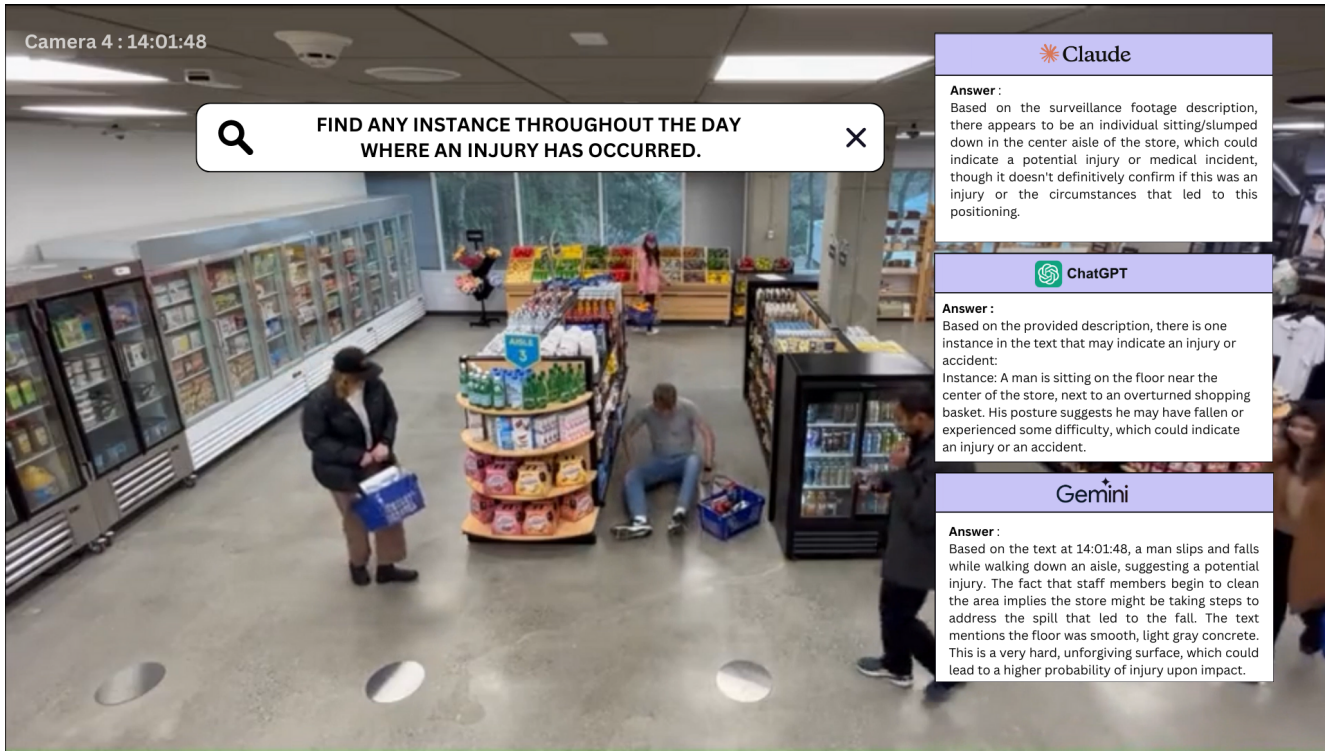

487

Figure 7. Visualization of model performance on selected CCTV footage dataset, demonstrating key detection and analysis metrics.

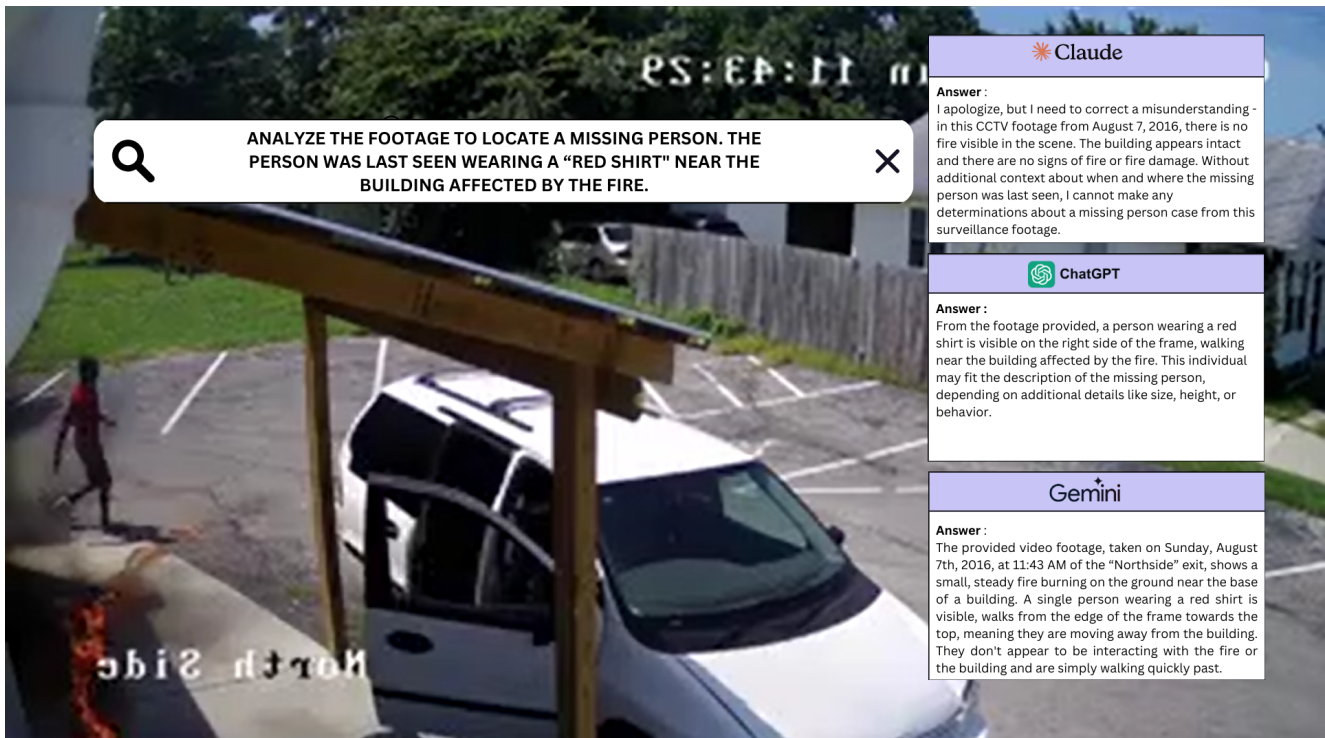

488

Figure 8. Visualization of model performance on selected CCTV footage dataset, demonstrating key detection and analysis metrics.
